## SpotClean adjusts for spot swapping in spatial transcriptomics data

Zijian Ni<sup>1,\*</sup>, Aman Prasad<sup>2,\*</sup>, Shuyang Chen<sup>1</sup>, Richard B. Halberg<sup>3,4</sup>, Lisa Arkin<sup>2</sup>, Beth Drolet<sup>2</sup>, Michael Newton<sup>1,5</sup>, Christina Kendzierski<sup>5</sup>

<sup>1</sup>Department of Statistics, University of Wisconsin-Madison, Madison, WI, USA

<sup>2</sup>Department of Dermatology, University of Wisconsin-Madison, Madison, WI, USA

<sup>3</sup>Department of Medicine, University of Wisconsin-Madison, Madison, WI, USA

<sup>4</sup>Department of Oncology, University of Wisconsin-Madison, Madison, WI, USA

<sup>5</sup>Department of Biostatistics and Medical Informatics, University of Wisconsin-Madison, Madison, WI, USA

\*co-first authors

### Summary

Recent spatial transcriptomics experiments utilize slides containing thousands of spots with spot-specific barcodes that bind mRNA. Ideally, unique molecular identifiers at a spot measure spot-specific expression, but this is often not the case owing to bleed from nearby spots, an artifact we refer to as spot swapping. We propose SpotClean to adjust for spot swapping and, in doing so, to increase the sensitivity and precision with which downstream analyses are conducted.

The 10x Genomics Visium (10x) platform<sup>1</sup> is a powerful and widely-used approach for profiling genome-wide gene expression across a tissue. In a 10x spatial transcriptomics experiment, fresh-frozen (or FFPE) tissue is sectioned and placed onto a slide containing 4992 spots, with each spot containing millions of capture oligonucleotides with spatial barcodes unique to that spot. The tissue is imaged, typically via Hematoxylin and Eosin (H&E) staining. Following imaging, the tissue is permeabilized to release mRNA which then binds to the capture oligonucleotides, generating a cDNA library consisting of transcripts bound by barcodes that preserve spatial information. Data from a 10x spatial transcriptomics experiment consists of the tissue image coupled with RNA-sequencing data collected from each spot. A first step in processing spatial transcriptomics data is tissue detection, where spots on the slide containing tissue are distinguished from background spots without tissue. Unique molecular identifier (UMI) counts at each spot containing tissue are then used in downstream analyses (Supplementary Figure 1).

Ideally, a gene-specific UMI at a given spot would represent expression of that gene at that spot, and spots without tissue would show no UMIs. This is not the case in practice. Messenger RNA bleed from nearby spots causes substantial contamination of UMI counts, an artifact we refer to as spot swapping. Evidence for spot swapping is shown in Figure 1 in a tissue sample from postmortem

human brain profiled as part of spatialLIBD, a project aimed at defining the spatial topography of gene expression in the six-layered human dorsolateral prefrontal cortex (DLPFC)<sup>2</sup>. Specifically, Figure 1a shows that UMI counts at background spots (which are zero in the absence of contamination) are relatively high compared with counts in tissue spots; and the counts decrease with increasing distance from the tissue (Figure 1b). Figure 1c shows the distribution of UMI counts for 50 genes in a tissue region, a nearby background region, and a distant background region. As a result of expression similarity between the tissue and nearby background, tissue and background spots are not easily distinguished (Figure 1d). This is emphasized again in Figure 1f, where spots on the slide are colored by membership in the graph-based clusters shown in Figure 1e. Supplementary Figures 2-4 show similar results from 13 additional datasets; and Supplementary Table 1 shows that the proportion of UMI counts in background spots ranges between 5% and 20% in most datasets.

Figure 1, Supplementary Figures 2-4, and Supplementary Table 1 demonstrate that spot swapping occurs from tissue to background, but evaluating the extent of spot swapping from tissue spot to tissue spot is more challenging. While the SpotClean model provides an estimate (Supplementary Table 2), we also consider tissue-specific marker genes identified in the spatialLIBD project. In the absence of spot swapping, expression for a layer-specific marker should be high within that layer, and low (or off) in other layers. When spot swapping occurs, marker expression is relatively high in nearby layers. This is evident with GFAP, for example, a marker known to be up-regulated in white matter (WM) and in the first annotated layer of the DLPFC (Layer1). Supplementary Figure 5 shows high expression of GFAP in WM and Layer1 spots, as expected, but also relatively high expression in tissue spots adjacent to WM and Layer1, with GFAP expression decreasing as distance from WM (or Layer1) increases. While it is possible that some increase in marker expression in adjacent tissue spots may be due to the presence of WM (or Layer1) cells at those spots, we note that the rate of expression decay into the background spots (where no cells are present) is similar to the rate of decay into adjacent tissue regions. Consequently, the possible presence of WM (or Layer1) cells in adjacent tissue spots is not sufficient to fully explain the observed expression pattern. Similar results are shown for a WM marker, MOBP (Supplementary Figure 5), as well as 13 additional markers (Supplementary Figure 6).

To more directly quantify the extent of spot swapping, we conducted chimeric experiments where human and mouse tissues were placed contiguously during sample preparation. For each experiment,

we annotated the H&E images to identify species-specific regions, and we calculated the proportion of spot-swapped reads (mouse-specific reads in human spots, human-specific reads in mouse spots, and reads in background spots). This is a lower bound on the proportion of spot-swapped reads (LPSS) as it does not account for spot swapping within species (e.g. reads from human spot  $t$  bound by probes at human spot  $t$ ); LPSS ranges between 26-37% in these experiments (Supplementary Table 1). Taken together, results from a comparison of tissue and background expression (Figure 1 and Supplementary Figures 2-4), analysis of marker genes (Supplementary Figures 5-6), and the chimeric experiment (Supplementary Table 1 and Supplementary Figure 7) demonstrate that spot swapping affects UMI counts in spatial transcriptomics experiments. This nuisance variability decreases the power and precision of downstream analyses (Figure 2b, Supplementary Figure 8).

The statistical methods developed to adjust for known sources of contamination in RNA-seq experiments<sup>3,4</sup> do not accommodate the spatial dependence inherent in spot swapping, and, consequently, are not sufficient in this setting (Supplementary Section S1). To adjust for the effects of spot swapping in 10x spatial transcriptomics experiments, we developed SpotClean. The approach is implemented in the R package *R/spotClean*. SpotClean was evaluated on simulated and case study data. In SimI, contaminated counts are generated assuming that local contamination follows a Gaussian kernel; SimII-IV relax the Gaussian assumption. In SimV, contaminated counts are simulated for genes having average expression that varies systematically across the slide. Supplementary Tables 3-6, which show the mean squared error (MSE) between true and decontaminated gene expression in simulated datasets, indicate that SpotClean provides improved estimates of expression; and Supplementary Figure 9 demonstrates that these improved estimates of expression increase the precision for identifying spatially varying genes.

Improved estimates of expression and increased precision are also observed in case study data. Figure 2a shows that SpotClean improves the specificity of GFAP in the spatialLIBD data by maintaining expression levels in WM and Layer1 and reducing spurious expression in the other layers. Supplementary Figure 10 shows similar results for the 15 markers shown in Supplementary Figure 6. Figure 2b and Supplementary Figure 8 consider genes known to be differentially expressed (DE) between WM and Layer6 in raw and SpotClean decontaminated data; SpotClean results in increased fold-changes and smaller p-values for the majority of known DE genes. The chimeric datasets provide additional examples. In particular, Figure 2d shows that SpotClean reduces the proportion of

spot-swapped UMI counts in the chimeric datasets. Similar results are shown in Figure 2e where we consider expression for human-specific and mouse-specific genes at human-specific and mouse-specific spots. Data decontaminated via SpotClean shows reduced expression of human genes in mouse tissue, with no reduction in human tissue, and vice versa.

The 10x Genomics Visium platform provides unprecedented opportunity to address biological questions, but artifacts induced by spot swapping must be adjusted for to ensure that maximal information is obtained from these powerful experiments. SpotClean provides for more accurate estimates of expression, thereby increasing the power and precision of downstream analyses.

## Figures

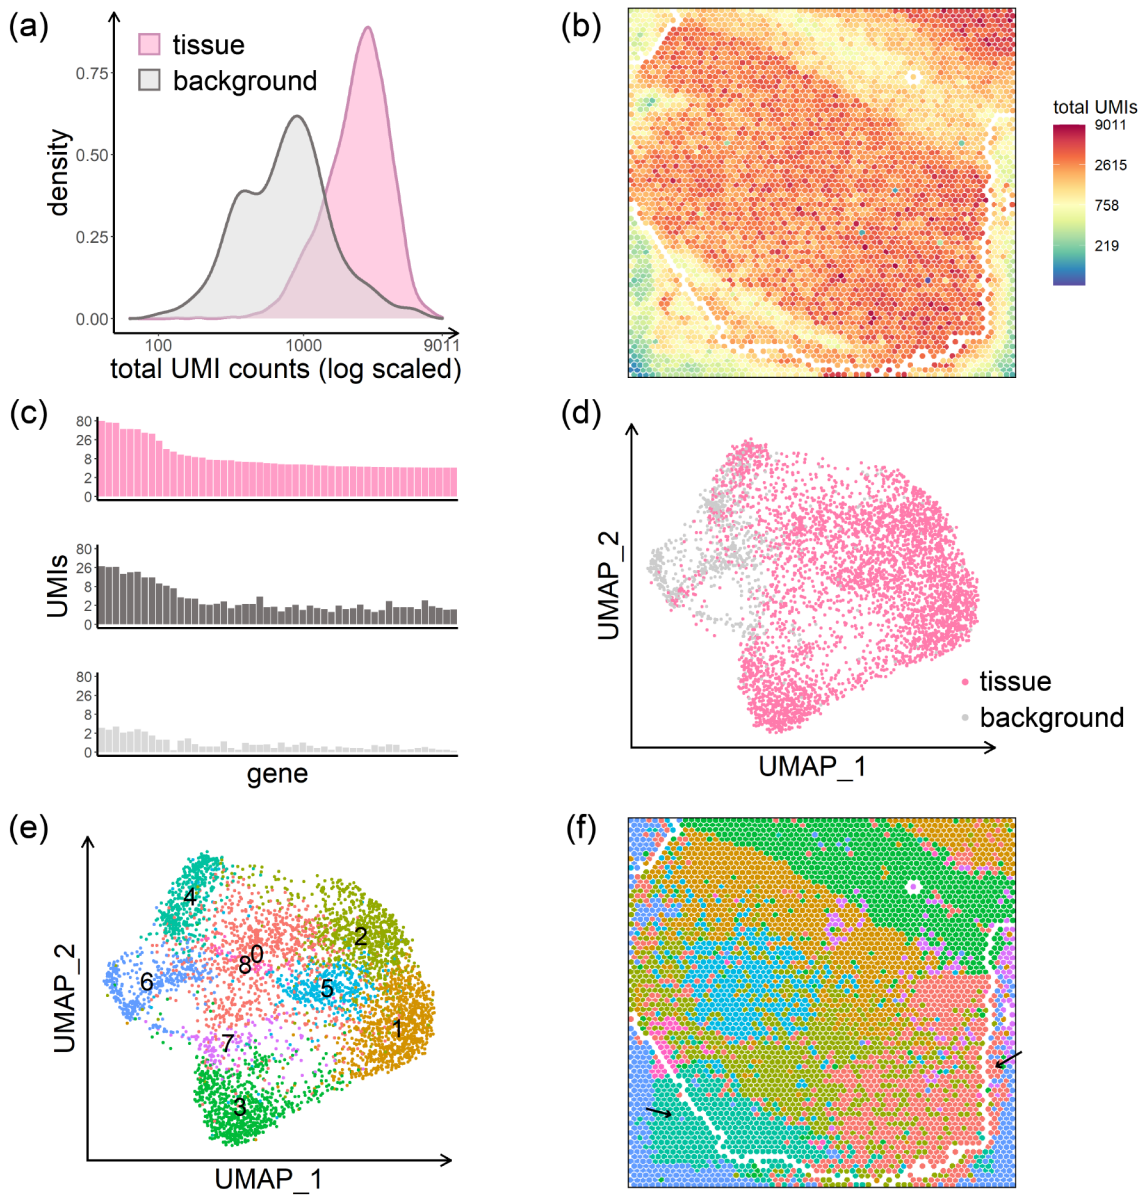

**Figure 1:** Data from the human dorsolateral prefrontal cortex profiled in the spatialLIBD experiment, sample LIBD\_151507. (a) UMI count densities for tissue and background spots show relatively high counts in the background. (b) UMI total counts in the background decrease with increasing distance from the tissue; the perimeter delineating tissue and background is shown in white. (c) Counts of the top 50 genes from a select tissue region (upper), from a nearby background region (middle), and from a distant background region (bottom) show the similarity between expression in tissue spots and nearby background spots due to spot swapping from tissue to background, an effect that decreases as distance from the tissue increases. The positions of the three regions are shown in Supplementary Figure 2. (d) Tissue and background spots are not distinguished visually via UMAP. (e) Graph-based clustering of all spots identifies 9 clusters. (f) Spots on the slide are colored by their cluster membership shown in (e). Black arrows highlight areas of spot swapping of signal from tissue to background. Spots on the perimeter (shown in white) have been removed from the summaries shown here to ensure that the effects shown are not due to spots on the tissue-background boundary. The H&E image for this dataset is shown in Supplementary Figure 2.

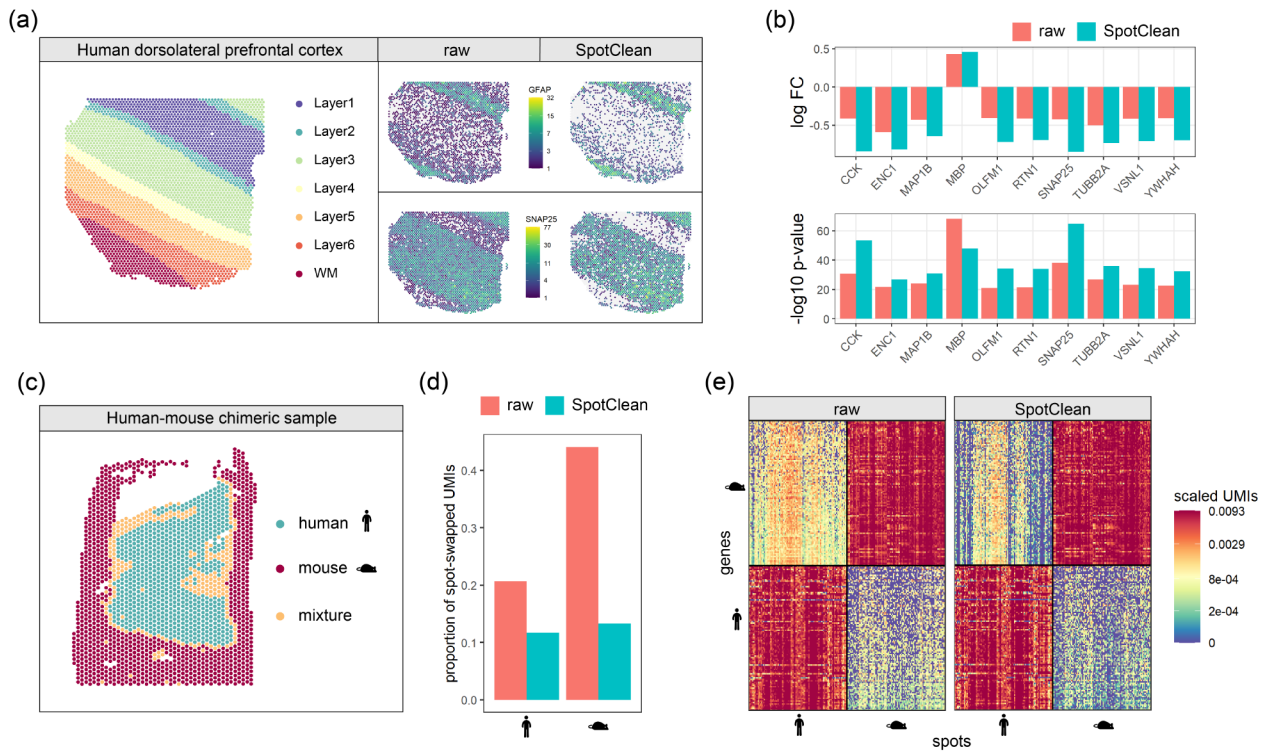

**Figure 2:** Data from the spatialLIBD experiment, sample LIBD\_151507, and the chimeric experiment, sample HM-1. (a) Known annotation of different layers of the human dorsolateral prefrontal cortex (left); layer-specific marker gene expression in the raw (middle) and SpotClean decontaminated (right) data show that SpotClean provides improved specificity of marker gene expression for GFAP, a marker for WM and Layer1, and for SNAP25, a neuronal marker up-regulated in Layer2-Layer6. (b) An analysis of genes known to be differentially expressed (DE) between WM and Layer6 in raw and SpotClean decontaminated data shows that SpotClean results in increased fold-changes and smaller p-values for the majority of known DE genes. (c) Species annotation of sample HM-1, a chimeric tissue of human skin and mouse duodenum. Spots annotated as mixtures were removed prior to calculating the summaries in panels (d) and (e) in an effort to ensure that the effects shown are not due to spots containing a mixture of the two species. (d) The proportion of spot-swapped UMI counts from all human genes (human-specific UMIs in background or mouse spots) are shown left for raw (salmon) and SpotClean decontaminated (turquoise) data; the proportion of spot-swapped UMI counts from all mouse genes (mouse-specific UMIs in background or human spots) are shown right. Note that there may be spot swapped UMIs within species (e.g. reads from human spot  $t$  bound by probes at human spot  $t'$ ), but they cannot be identified in this experiment. (e) Scaled expression (UMIs are scaled so that each row sums to 1) for the top 100 human genes and top 100 mouse genes in the top 100 human spots and top 100 mouse spots. The top 100 human or mouse genes (spots) are those genes (spots) with highest total UMI counts. Data decontaminated via SpotClean shows reduced expression of human genes in mouse tissue, with no reduction in human tissue; and vice versa.

## ACCESSION CODES

Raw sequence data for the human-mouse chimeric experiments are available at GEO (ID in progress). Links to public datasets are available in Supplementary Table 7. The R package *SpotClean* is available at <https://github.com/zijianni/SpotClean> and will be submitted to Bioconductor. Codes for simulation and real data analyses as well as processed data can be found at [https://github.com/zijianni/codes\\_for\\_SpotClean\\_paper](https://github.com/zijianni/codes_for_SpotClean_paper).

## ACKNOWLEDGMENTS

This work was supported by NIH GM102756 and NIH UL1TR002373. The authors thank the University of Wisconsin Translational Research Initiatives in Pathology (TRIP) laboratory for assistance with sample preparation (P30 CA014520 and S10 OD023526) and the University of Wisconsin Biotechnology Center DNA Sequencing Facility for providing RNA sequencing facilities and services.

## AUTHOR CONTRIBUTIONS

Z.N. discovered the spot swapping artifact. Z.N. and C.K. designed the research and wrote the first version of the manuscript. Z.N., C.K., and M.N. developed the SpotClean method. A.P. and R.H. designed the chimeric samples and conducted the chimeric experiments. Z.N. and S.C. conducted simulations and quality control evaluations. Z.N., S.C. and C.K. built and tested the R package. All authors contributed to writing the manuscript.

## COMPETING FINANCIAL INTERESTS

None.

## ONLINE METHODS

**Versions:** The following R packages were used in the analysis: R-4.0.2; R/SpotClean-0.99.0; R/SoupX-1.5.0; R/celda-1.5.11; R/Seurat-3.2.2; R/scran-1.17.20; R/reticulate-1.16; Python-3.7.4; Python/spatialde-1.1.3; FastQC-0.11.7; MultiQC-1.9; Space Ranger-1.2.2; Loupe Browser-4.2.0.

**SpotClean:** Let  $K$  be the total number of spots,  $G$  be the set of genes,  $I_t$  be the set of tissue spots with cardinality  $|I_t| = K_t$ , and  $I_b$  be the set of background spots with cardinality  $|I_b| = K_b$  where  $K_t + K_b = K$ . The true (i.e., uncontaminated) UMI counts are given by  $\{Y_{g,t}\}_{g \in G, t \in I_t}$  and observed counts by  $\mathcal{D} = \{X_{g,j}\}_{g \in G, j \in I_t \cup I_b}$ . As our interest here is to characterize the extent of spot swapping, we introduce the missing variable  $B_{g,t,j}$  to be the UMI count for gene  $g$  leaving tissue spot  $t$  and binding to tissue (or background) spot  $j$ . Likewise we define  $S_{g,t}$  to be the UMI count arising from gene  $g$  in tissue spot  $t$  that remain at that spot and thus are not subject to bleeding. We decompose  $Y_{g,t}$  into a sum:  $Y_{g,t} = S_{g,t} + B_{g,t}$ , where  $B_{g,t} = \sum_{k \in I_t} B_{g,t,k}$  counts all bleed-outs from spot  $t$  to other spots  $k \neq t$ . Extending notation, we set  $Y_{g,b} = S_{g,b} = B_{g,b} = 0$  for background spots  $b \in I_b$  since background spots do not express mRNA. With these missing variables defined, we note that the measured count  $X_{g,j} = S_{g,j} + R_{g,j}$  where  $R_{g,j} = \sum_{k \in I_t} B_{g,k,j}$  represents UMI counts received at spot  $j$  due to spot swapping. We leverage this missing-data formulation by flexibly modeling the component counts with independent Poisson distributions, which are known to be effective for UMI counts<sup>5</sup>.

For a collection of spot and gene-specific parameters, as well as global parameters controlling the swapping rates, we parameterize the distributions as:  $S_{g,t} \sim \text{Poisson}(\mu_{g,t}(1 - r_\beta))$  and  $B_{g,t,j} \sim \text{Poisson}(\mu_{g,t} r_\beta \left[ (1 - r_\gamma) w_{t,j} + r_\gamma \frac{1}{K} \right])$  where  $r_\beta$  is the bleeding rate;  $r_\gamma$  is a distal and  $1 - r_\gamma$  is a proximal contamination rate. By taking the global bleeding rate  $r_\beta \in [0,1]$ , it follows that the uncontaminated counts follow:  $Y_{g,t} \sim \text{Poisson}(\mu_{g,t})$  for target parameters  $\mu_{g,t}$  whose estimates constitute statistical estimates of the uncontaminated counts. Likewise for measured counts,  $X_{g,j} \sim \text{Poisson}(\eta_{g,j})$ , for induced gene and spot parameters. We define  $w_{t,j}$  by a weighted Gaussian kernel:  $w_{t,j} = K(d_{t,j}, \sigma) / \sum_{j'} K(d_{t,j'}, \sigma)$  where  $d_{t,j}$  is the physical Euclidean distance between spots  $t$  and  $j$



measured in pixels in the slide image,  $\sigma$  is the kernel bandwidth, and  $K(d, \sigma) = e^{(-d^2/2\sigma^2)}$  is a Gaussian kernel<sup>6</sup>.

**Parameter estimation:** Plug-in estimates obtained by minimizing the residual sum of squares (RSS) between observed total counts and their expected values are used to estimate  $r_\beta$ ,  $r_\gamma$ , and  $\sigma$ .

Specifically,

$$(\hat{r}_\beta, \hat{r}_\gamma, \hat{\sigma}, \{\hat{\mu}_{\cdot t}\}_{t \in I_t}) = \underset{r_\beta, r_\gamma, \sigma, \{\mu_{\cdot t}\}_{t \in I_t}}{\operatorname{argmin}} \sum_{j \in I_t \cup I_b} (X_{\cdot j} - \eta_{\cdot j})^2$$

where  $X_{\cdot j}$ ,  $\eta_{\cdot j}$ ,  $\mu_{\cdot j}$  are the summations of  $X_{g,j}$ ,  $\eta_{g,j}$ ,  $\mu_{g,j}$  among all genes, respectively. To reduce computational complexity,  $\hat{\sigma}$  is taken as the minimum RSS calculated over a grid of candidate values. Explicit gradients are calculated for  $r_\beta$  and  $r_\gamma$  and estimates are obtained by L-BFGS-B gradient descent<sup>7</sup>. Details are provided in Supplementary Section S2. Since this optimization problem is not necessarily convex, it is important to choose appropriate initial values. For the initial values  $\{\mu_{\cdot t}^{(0)}\}_{t \in I_t}$  of  $\{\mu_{\cdot t}\}_{t \in I_t}$ , we use the observed total UMI counts  $\{X_{\cdot t}\}_{t \in I_t}$  in tissue spots and scale them up so that they sum to the total UMIs in the data. The initial bleeding rate,  $r_\beta^{(0)}$ , is the average expression in background spots divided by the average expression in all spots; and the initial distal contamination rate,  $r_\gamma^{(0)}$ , is defined by average expression in the 25<sup>th</sup>-50<sup>th</sup> percentile of all background spots divided by average expression in all background spots.

With estimates  $\hat{r}_\beta, \hat{r}_\gamma, \hat{\sigma}$  of the global parameters, true expression levels  $\{\mu_{g,t}\}_{g \in G, t \in I_t}$  are readily estimated using an expectation-maximization (EM) algorithm<sup>8</sup>. Details are provided in Supplementary Section S3. For the initial values of true expressions  $\{\mu_{g,t}^{(0)}\}_{g \in G, t \in I_t}$ , we use the observed UMI counts  $\{X_{g,t}\}_{g \in G, t \in I_t}$  and scale up each gene so that their summations are equal to the gene summations in all spots.

**Estimation of spot-level contamination rate:** For tissue spot  $t$ , let  $c_t$  be the proportion of contaminated UMIs from total observed UMIs. We estimate  $c_t$  using the estimated contamination received in  $t$  over its estimated contaminated total counts from model fitting:  $\hat{c}_t =$

$$\frac{\hat{E}(\sum_{t' \in I_t - \{t\}} \sum_g B_{g,t',t})}{\hat{E}(X_{\cdot t})}. \text{ Validation of this estimate is provided in Supplementary Figure 11.}$$

**Analysis of publicly available case study datasets:** We downloaded UMI count matrices for 11 publicly available datasets; links are provided in Supplementary Table 7. For each dataset considered, the count matrix was normalized via scran<sup>9</sup>, following the Seurat<sup>10</sup> pipeline for dimension reduction, clustering, and visualization. Seurat functions *FindVariableFeatures(nfeatures = 4000)*, *ScaleData()*, *RunPCA()*, *RunUMAP()*, *FindNeighbors()*, and *FindClusters()* were applied under default settings.

**Application of SoupX, DecontX, SpotClean, and SpatialDE:** Default parameters were used for SpotClean and DecontX. Since SoupX requires manual input of clusters, we first applied the Seurat<sup>10</sup> pipeline on the raw tissue UMI count matrix to get cluster labels, with functions *NormalizeData()*, *FindVariableFeatures()*, *ScaleData()*, *RunPCA()*, *FindNeighbors()*, *FindClusters()* applied under default settings. Parameters for SoupX (*soupRange* in *estimateSoup()*, *tfidfMin* and *soupQuantile* in *autoEstCont()*) were manually tuned when the default settings failed. Some datasets did not run even after parameter tuning; results from these datasets are marked as NA. SpotClean decontaminates genes with average expression above 1, high variance as determined by Seurat's *FindVariableFeatures* function, or both. All methods were applied to these same set of genes. In the simulated data, we force all methods to decontaminate all genes since there are relatively few (1000 or 3000 genes depending on the simulation).

**Identification of marker genes and DE genes:** The spatialLIBD project presented in Maynard *et al.*<sup>2</sup> consists of spatial expression in the six-layered dorsolateral prefrontal cortex (DLPFC). The authors identified a number of marker genes for distinct layers of the DLPFC. In addition to these, we also considered marker genes from a single-cell RNA-seq study of Alzheimer's disease<sup>11</sup> where markers differentiating between known cell types were identified. The markers shown here were selected from these papers if they were highly expressed (in the upper 25<sup>th</sup> percentile) in the spatialLIBD datasets. We also evaluate the genes reported as DE between WM and Layer6 in Maynard *et al.*<sup>2</sup>. We filtered their list of DE genes and considered those genes having  $FDR \leq 10^{-4}$ . From those, we chose the top 100 highest expressors in the raw data, sorted by fold change, and selected the top 10 for each dataset. For the DE analysis, raw and decontaminated tissue matrices were normalized using scran<sup>9</sup>; for each gene, p-values were obtained from a two-sample two-sided t-test between WM and Layer6 spots.

**Human-mouse chimeric experiment:** Fresh sections of normal human skin tissue were obtained during routine dermatologic surgery under University of Wisconsin School of Medicine and Public Health Institutional Review Board (Approval #2010-0367). On the same day, fresh mouse tissue was harvested. Three mixed species tissue blocks were then prepared under cold conditions as follows and frozen over a bed of dry ice and stored at - 80°C in optimal tissue cutting (OCT) medium until they were ready to use:

HM-1: Duodenum from a 10-week-old C57BL/6J mouse as casing to a 4 mm punch section “cylinder” of human skin

HM-2: Colon from a 10-week-old C57BL/6J mouse as casing to a 4 mm punch section “cylinder” of human skin

HM-3: Heart from a 10-week-old C57BL/6J mouse encasing a 4 mm punch section “cylinder” of human skin

**Visium Spatial Transcriptomics:** The Visium Spatial Tissue Optimization Slide & Reagent kit (10X Genomics) was used to optimize permeabilization conditions for the chimeric tissue according to manufacturer’s protocol and yielded an optimal tissue permeabilization time of 12 minutes. The Visium Spatial Gene Expression Slide & Reagent kit (10X Genomics) was used to generate sequencing libraries. Sections were cut at 10 µm thickness and mounted onto Visium slide capture areas, stained with H&E, digitally imaged, and then permeabilized for library preparation. Sequencing libraries were prepared following the manufacturer’s protocol. Initial quality control of the libraries was by analysis of 2x150 MiSeq data for each sample. The libraries were then sequenced on a NovaSeq 6000 (Illumina), with 29 bases from read 1 and 101 from read 2, at a depth of 500k-600k reads per spot. The actual depth was 455652, 440024, 538709 reads per spot for sample HM-1, HM-2, HM-3, respectively.

**Alignment and pre-processing in the chimeric experiment:** The sequencing quality of each sample was evaluated using FastQC<sup>12</sup> and MultiQC<sup>13</sup>. All FastQ files passed quality control. Tissues were manually aligned using the Loupe Browser. Reads were aligned to the GRCh38+mm10 reference genome (refdata-gex-GRCh38-and-mm10-2020-A from <https://support.10xgenomics.com/single-cell-gene-expression/software/downloads/latest>) and gene expression was quantified using Space Ranger under default parameters. Following alignment, we

considered only those reads labeled confidently mapped by SpaceRanger; confidently mapped reads are reads that map uniquely to a gene. We refer to a gene as a human gene if it has prefix GRCh38; a mouse gene has prefix mm10. UMI counts were normalized for differences in total counts across species by scaling total UMI counts in mouse to match total UMI counts in human.

Genes having average expression  $<0.01$  were removed.

**Human and mouse tissue spot annotation in the chimeric experiment:** Tissue spots are labelled as human, mouse, or pathological mixture based on visual inspection of the H&E images. A pathological mixture spot is one with tissue contributions from both species that can be visually verified in the H&E image. A pure human or pure mouse spot was relabeled as a computational mixture spot if the spot label differs from the majority of UMIs. Specifically, a human (mouse) spot is labelled as a computational mixture if the total UMI counts from mouse (human) exceeds the median of total UMI counts across all mouse spots (human spots). Mixture spots were removed prior to analyses in an effort to ensure that the effects shown are not due to spots containing a mixture of the two species.

**Lower bound on the proportion of spot swapped reads (LPSS):** Spot swapped reads include reads from one tissue spot binding background probes (tissue-to-background) as well as reads at one tissue spot binding probes at another tissue spot (tissue-to-tissue). It is not possible to directly measure tissue-to-tissue swapping in most cases. However, the chimeric experiment provides some insight into the extent of spot swapping tissue-to-tissue. We define LPSS in the chimeric experiment as the proportion of misclassified reads (mouse reads in human spots, human reads in mouse spots, and reads in background spots). This is a lower bound as it does not account for spot swapping within species (e.g. reads from human spot  $t$  bound by probes at human spot  $t'$ ).

**Simulations:** SimI simulates the spot swapping effect to get contaminated UMI counts given an input dataset. Specifically, starting from an input UMI count matrix of real data, 3000 genes with highest total UMI counts were selected. Expression for these genes was scaled to target the same average UMI total counts (average taken over spots) across input datasets. Denote the resulting matrix by  $\{\mu_{g,t}\}_{t \in I_t}$ . The bleeding rate  $r_\beta$  and distal contamination rate  $r_\gamma$  were estimated from the input data, using the same approach as described for obtaining initial values in SpotClean. The spot

distances  $\{d_{t,j}\}_{t \in I_t, j \in I_t \cup I_b}$  were calculated based on the spot coordinates in the H&E image of the input dataset; the contamination radius,  $\sigma$ , was set to 10; and the weights which describe the proportion of UMIs swapping locally from tissue spot  $t$  to any spot  $j$ ,  $w_{t,j}$ , is given by a Gaussian kernel. The expected contamination of gene  $g$  from tissue spot  $t$  to spot  $j$  is then given by  $\mu_{g,t} r_\beta \left[ (1 - r_\gamma) w_{t,j} + r_\gamma \frac{1}{K} \right]$ . Summing contamination from all tissue spots to spot  $j$  and adding the UMIs that stay at  $j$ ,  $\mu_{g,j} (1 - r_\beta)$ , gives the expected observed expression  $\eta_{g,j}$ . Simulated counts for gene  $g$  in spot  $j$  are sampled from  $\text{Poisson}(\eta_{g,j})$ .

Additional simulations are similar, but proximal contamination weights are not given by a Gaussian kernel. Rather, SimII, SimIII, and SimIV assume proximal contamination weights are given by a Linear, Laplace, and Cauchy kernel, respectively.

For SimV, starting from a UMI count matrix of real data, we select the top 5000 most highly expressed genes; any gene having average expression less than 0.1 is removed. SpatialDE<sup>14</sup> is then applied using default settings; the top 500 highest expressed genes with q-value  $\leq 0.01$  are identified as true spatially variable (SV) genes. For each SV gene, we simulate a matched non-SV gene by sampling independent Poisson counts parameterized by the average expression of the SV gene.

## References

1. Ståhl, P. L. *et al.* Visualization and analysis of gene expression in tissue sections by spatial transcriptomics. *Science* vol. 353 78–82 (2016).
2. Maynard, K. R. *et al.* Transcriptome-scale spatial gene expression in the human dorsolateral prefrontal cortex. *Nature Neuroscience* **24**, 425–436 (2021).
3. Young, M. D. & Behjati, S. SoupX removes ambient RNA contamination from droplet-based single-cell RNA sequencing data. *GigaScience* **9**, 1–10 (2020).
4. Yang, S. *et al.* Decontamination of ambient RNA in single-cell RNA-seq with DecontX. *Genome Biology* **21**, 57 (2020).
5. Kim, T. H., Zhou, X. & Chen, M. Demystifying “drop-outs” in single-cell UMI data. *Genome Biology* **21**, 196 (2020).
6. Chung, M. K. Gaussian kernel smoothing. (2021).
7. Byrd, R. H., Lu, P., Nocedal, J. & Zhu, C. A Limited Memory Algorithm for Bound Constrained Optimization. *SIAM Journal on Scientific Computing* **16**, 1190–1208 (1995).
8. Dempster, A. P., Laird, N. M. & Rubin, D. B. Maximum Likelihood from Incomplete Data via the EM Algorithm. *Journal of the Royal Statistical Society. Series B (Methodological)* **39**, 1–38 (1977).

9. L. Lun, A. T., Bach, K. & Marioni, J. C. Pooling across cells to normalize single-cell RNA sequencing data with many zero counts. *Genome Biology* **17**, 75 (2016).
10. Stuart, T. *et al.* Comprehensive Integration of Single-Cell Data. *Cell* **177**, 1888-1902.e21 (2019).
11. Mathys, H. *et al.* Single-cell transcriptomic analysis of Alzheimer's disease. *Nature* **570**, 332–337 (2019).
12. Andrews, S., Krueger, F., Seifried-Pichon, A., Biggin, F. & Wingett, S. FastQC: A quality control tool for high throughput sequence data. Babraham Bioinformatics. *Babraham Institute* vol. 1 1  
<https://www.bioinformatics.babraham.ac.uk/projects/fastqc/> <http://www.bioinformatics.babraham.ac.uk/projects/fastqc/> (2015).
13. Ewels, P., Magnusson, M., Lundin, S. & Källér, M. MultiQC: summarize analysis results for multiple tools and samples in a single report. *Bioinformatics* **32**, 3047–3048 (2016).
14. Svensson, V., Teichmann, S. A. & Stegle, O. SpatialDE: Identification of spatially variable genes. *Nature Methods* **15**, 343–346 (2018).
