1 SpotClean adjusts for spot swapping in spatial transcriptomics data

2  
3 Zijian Ni<sup>1,\*</sup>, Aman Prasad<sup>2,\*</sup>, Shuyang Chen<sup>1</sup>, Richard B. Halberg<sup>3,4</sup>, Lisa Arkin<sup>2</sup>, Beth Drolet<sup>2</sup>,  
4 Michael Newton<sup>1,5</sup>, Christina Kendzioriski<sup>5</sup>

5  
6 <sup>1</sup>Department of Statistics, University of Wisconsin-Madison, Madison, WI, USA

7 <sup>2</sup>Department of Dermatology, University of Wisconsin-Madison, Madison, WI, USA

8 <sup>3</sup>Department of Medicine, University of Wisconsin-Madison, Madison, WI, USA

9 <sup>4</sup>Department of Oncology, University of Wisconsin-Madison, Madison, WI, USA

10 <sup>5</sup>Department of Biostatistics and Medical Informatics, University of Wisconsin-Madison, Madison,  
11 WI, USA

12 \*co-first authors

### 13 Summary

14  
15 Spatial transcriptomics (ST) is a powerful and widely-used approach for profiling genome-wide gene expression  
16 across a tissue with emerging applications in molecular medicine and tumor diagnostics. Recent spatial  
17 transcriptomics experiments utilize slides containing thousands of spots with spot-specific barcodes that bind  
18 mRNA. Ideally, unique molecular identifiers at a spot measure spot-specific expression, but this is often not the  
19 case owing to bleed from nearby spots, an artifact we refer to as spot swapping. We propose SpotClean to adjust for  
20 spot swapping and, in doing so, to increase the sensitivity and precision with which downstream analyses are  
21 conducted.

22  
23 Spatial transcriptomics (ST) is a powerful and widely-used approach for profiling genome-wide gene  
24 expression across a tissue<sup>1,2</sup>. In a typical ST experiment, fresh-frozen (or FFPE) tissue is sectioned  
25 and placed onto a slide containing spots, with each spot containing millions of capture  
26 oligonucleotides with spatial barcodes unique to that spot. The tissue is imaged, typically via  
27 Hematoxylin and Eosin (H&E) staining. Following imaging, the tissue is permeabilized to release  
28 mRNA which then binds to the capture oligonucleotides, generating a cDNA library consisting of  
29 transcripts bound by barcodes that preserve spatial information. Data from an ST experiment consists  
30 of the tissue image coupled with RNA-sequencing data collected from each spot. A first step in  
31 processing ST data is tissue detection, where spots on the slide containing tissue are distinguished  
32 from background spots without tissue. Unique molecular identifier (UMI) counts at each spot  
33 containing tissue are then used in downstream analyses (Supplementary Figure 1).

34

35 Ideally, a gene-specific UMI at a given spot would represent expression of that gene at that spot, and  
36 spots without tissue would show no UMIs. This is not the case in practice. Messenger RNA bleed  
37 from nearby spots causes substantial contamination of UMI counts, an artifact we refer to as spot  
38 swapping. Evidence for spot swapping is shown in Figure 1 in a tissue sample from postmortem  
39 human brain profiled as part of spatialLIBD, a project aimed at defining the spatial topography of  
40 gene expression in the six-layered human dorsolateral prefrontal cortex (DLPFC)<sup>3</sup>. Specifically,  
41 Figure 1a shows that UMI counts at background spots (which are zero in the absence of  
42 contamination) are high compared with counts in tissue spots; and the counts decrease with  
43 increasing distance from the tissue (Figure 1b). Figure 1c shows the distribution of UMI counts for 50  
44 genes in a tissue region, a nearby background region, and a distant background region. As a result of  
45 expression similarity between the tissue and nearby background, tissue and background spots are not  
46 easily distinguished (Figure 1d). This is emphasized again in Figure 1f, where spots on the slide are  
47 colored by membership in the graph-based clusters shown in Figure 1e. Supplementary Figures 2-5  
48 show similar results from 16 additional datasets; and Supplementary Table 1 shows that the  
49 proportion of UMI counts in background spots ranges between 5% and 20% in most datasets.

50  
51 Figure 1, Supplementary Figures 2-5, and Supplementary Table 1 demonstrate that spot swapping  
52 occurs from tissue to background, but evaluating the extent of spot swapping from tissue spot to  
53 tissue spot is more challenging. While the SpotClean model provides an estimate (Supplementary  
54 Table 2), we also consider tissue-specific marker genes identified in the spatialLIBD project. In the  
55 absence of spot swapping, expression for a layer-specific marker should be high within that layer, and  
56 low (or off) in other layers. When spot swapping occurs, marker expression is relatively high in  
57 nearby layers. This is evident with GFAP, for example, a marker known to be up-regulated in white  
58 matter (WM) and in the first annotated layer of the DLPFC (Layer1). Supplementary Figure 6 shows  
59 high expression of GFAP in WM and Layer1 spots, as expected, but also relatively high expression in  
60 tissue spots adjacent to WM and Layer1, with GFAP expression decreasing as distance from WM (or  
61 Layer1) increases. While it is possible that some increase in marker expression in adjacent tissue  
62 spots may be due to the presence of WM (or Layer1) cells at those spots, we note that the rate of  
63 expression decay into the background spots (where no cells are present) is similar to the rate of decay  
64 into adjacent tissue regions. Consequently, the possible presence of WM (or Layer1) cells in adjacent  
65 tissue spots is not sufficient to fully explain the observed expression pattern. Similar results are

66 shown for a WM marker, MOBP (Supplementary Figure 6), as well as 13 additional markers  
67 (Supplementary Figure 7).

68

69 To more directly quantify the extent of spot swapping, we conducted chimeric experiments where  
70 human and mouse tissues were placed contiguously during sample preparation. For each experiment,  
71 we annotated the H&E images to identify species-specific regions, and we calculated the proportion  
72 of spot-swapped reads (mouse-specific reads in human spots, human-specific reads in mouse spots,  
73 and reads in background spots). This is a lower bound on the proportion of spot-swapped reads  
74 (LPSS) as it does not account for spot swapping within species (e.g. reads from human spot  $t$  bound  
75 by probes at human spot  $t'$ ); LPSS ranges between 26-37% in these experiments (Supplementary  
76 Table 1). Taken together, results from a comparison of tissue and background expression (Figure 1  
77 and Supplementary Figures 2-5), analysis of marker genes (Supplementary Figures 6-7), and the  
78 chimeric experiment (Supplementary Table 1 and Supplementary Figure 8) demonstrate that spot  
79 swapping affects UMI counts in ST experiments. This nuisance variability decreases the power and  
80 precision of downstream analyses (Figure 2b, Figure 2f-h, Supplementary Figure 9).

81

82 The statistical methods developed to adjust for known sources of contamination in RNA-seq  
83 experiments<sup>4,5</sup> do not accommodate the spatial dependence inherent in spot swapping, and,  
84 consequently, are not sufficient in this setting (Supplementary Section S1). To adjust for the effects  
85 of spot swapping in ST experiments, we developed SpotClean. The approach is implemented in the R  
86 package *R/spotClean*. SpotClean was evaluated on simulated and case study data. In SimI,  
87 contaminated counts are generated assuming that local contamination follows a Gaussian kernel;  
88 SimII-IV relax the Gaussian assumption. In SimV, contaminated counts are simulated for genes  
89 having average expression that varies systematically across the slide. Supplementary Tables 3-6,  
90 which show the mean squared error (MSE) between true and decontaminated gene expression in  
91 simulated datasets, indicate that SpotClean provides better estimates of expression; and  
92 Supplementary Figure 10 demonstrates that SpotClean expression estimates lead to increased  
93 precision for identifying spatially varying genes.

94

95 The benefits of SpotClean on downstream analyses are also illustrated in case study data.  
96 Specifically, SpotClean increases the specificity of marker gene expression, increases the power for  
97 identifying DE genes, and improves the accuracy of spot annotations. Figure 2a shows that

98 SpotClean improves the specificity of GFAP in the spatialLIBD data by maintaining expression  
99 levels in WM and Layer1 and reducing spurious expression in the other layers. Supplementary  
100 Figure 11 shows similar results for the 15 markers shown in Supplementary Figure 7. Figure 2b and  
101 Supplementary Figure 9 consider genes known to be differentially expressed (DE) between WM and  
102 Layer6 in raw and SpotClean decontaminated data; SpotClean results in increased fold-changes and  
103 smaller p-values for known DE genes. The chimeric datasets provide additional examples. In  
104 particular, Figure 2d shows that SpotClean reduces the proportion of spot-swapped UMI counts in the  
105 chimeric datasets. Similar results are shown in Figure 2e where we consider expression for human-  
106 specific and mouse-specific genes at human-specific and mouse-specific spots. Data decontaminated  
107 via SpotClean shows reduced expression of human genes in mouse tissue, with no reduction in  
108 human tissue, and vice versa.

109  
110 There is considerable interest in applying spatial transcriptomics to personalized medicine, such as  
111 molecular profiling of patient tumor biopsies to guide diagnosis and precision therapy. SpotClean  
112 demonstrates substantial advantage in such applications where accurate spot annotation is crucial.  
113 Figure 2f shows a human breast cancer sample (ductal carcinoma), where the diagnosis and extent  
114 and invasiveness of tumor is typically estimated through evaluation of an H&E image by a  
115 pathologist. Spatial transcriptomics can provide additional information including identifying subtle  
116 collections of malignant cells, but accurate spot annotation is required for this information to be  
117 useful in clinical practice, and especially so as not to overcall tumor burden. Figure 2f shows spots  
118 annotated using SpotClean data versus spots annotated using data that has not been decontaminated  
119 via SpotClean. The non-decontaminated data misidentifies many spots as malignant including those  
120 containing benign inflammatory cells surrounding the tumor whereas the SpotClean decontaminated  
121 data more closely resembles identification of malignant cells on the H&E image. Figure 2g-h show  
122 that without SpotClean, over 13% of the spots labelled malignant in the raw data are likely false calls  
123 due to spot swapping.

124  
125 Spatial transcriptomics provides unprecedented opportunity to address biological questions and  
126 enhance patient care, but artifacts induced by spot swapping must be adjusted for to ensure that  
127 maximal information is obtained from these powerful experiments. SpotClean provides for more  
128 accurate estimates of expression, thereby increasing the power and precision of downstream analyses.  
129

130 **Figures**

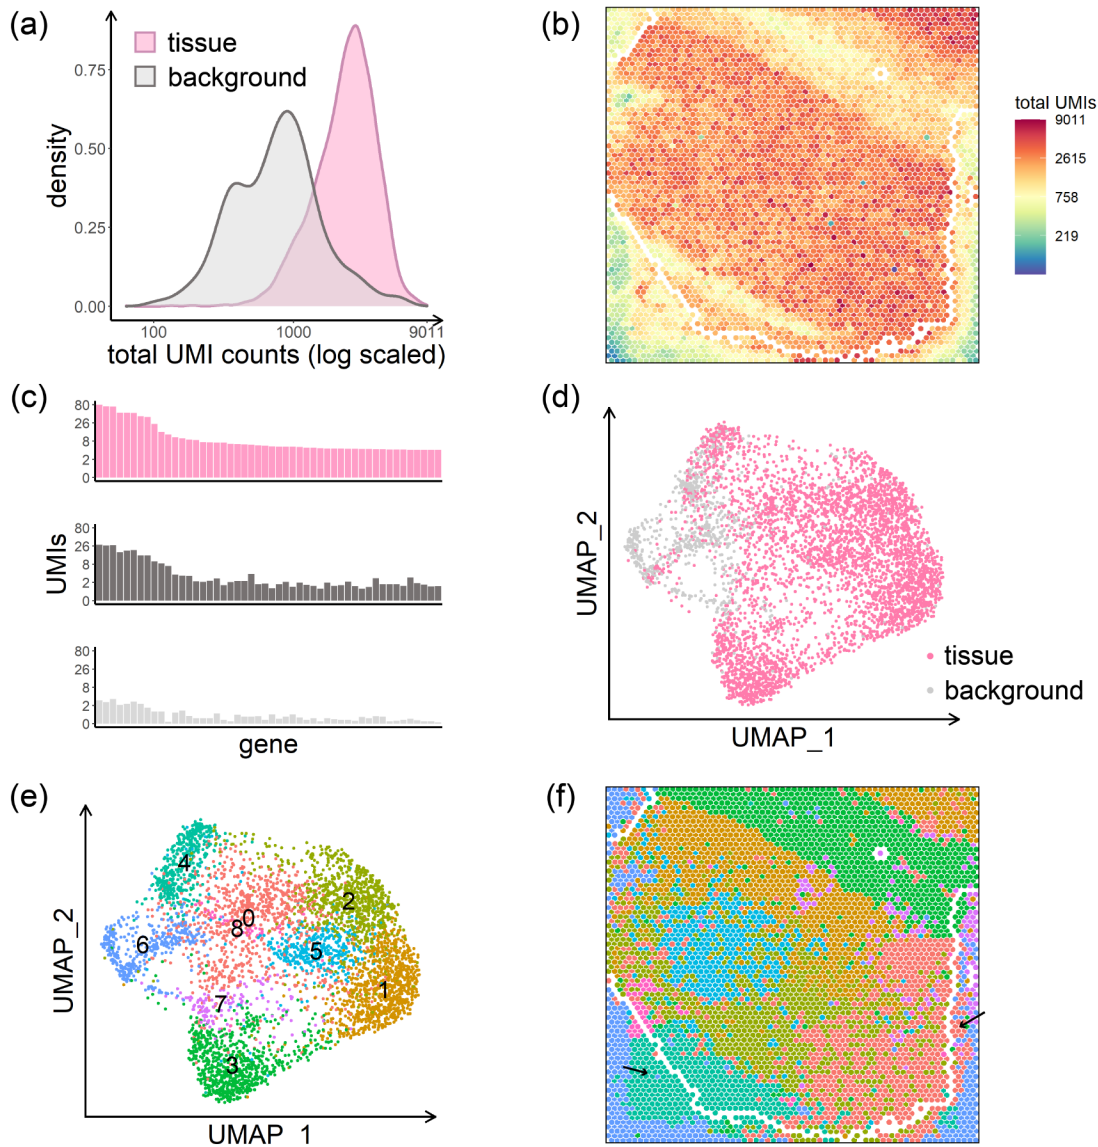

131  
132 **Figure 1:** Data from the human dorsolateral prefrontal cortex profiled in the spatialLIBD experiment,  
133 sample LIBD\_151507. (a) UMI count densities for tissue and background spots show relatively high counts  
134 in the background. (b) UMI total counts in the background decrease with increasing distance from the tissue;  
135 the perimeter delineating tissue and background is shown in white. (c) Counts of the top 50 genes from a  
136 select tissue region (upper), from a nearby background region (middle), and from a distant background  
137 region (bottom) show the similarity between expression in tissue spots and nearby background spots due to  
138 spot swapping from tissue to background, an effect that decreases as distance from the tissue increases. The  
139 positions of the three regions are shown in Supplementary Figure 2. (d) Tissue and background spots are  
140 not distinguished visually via UMAP. (e) Graph-based clustering of all spots identifies 9 clusters. (f) Spots  
141 on the slide are colored by their cluster membership shown in (e). Black arrows highlight areas of spot  
142 swapping of signal from tissue to background. Spots on the perimeter (shown in white) have been removed  
143 from the summaries shown here to ensure that the effects shown are not due to spots on the tissue-  
144 background boundary. The H&E image for this dataset is shown in Supplementary Figure 2.



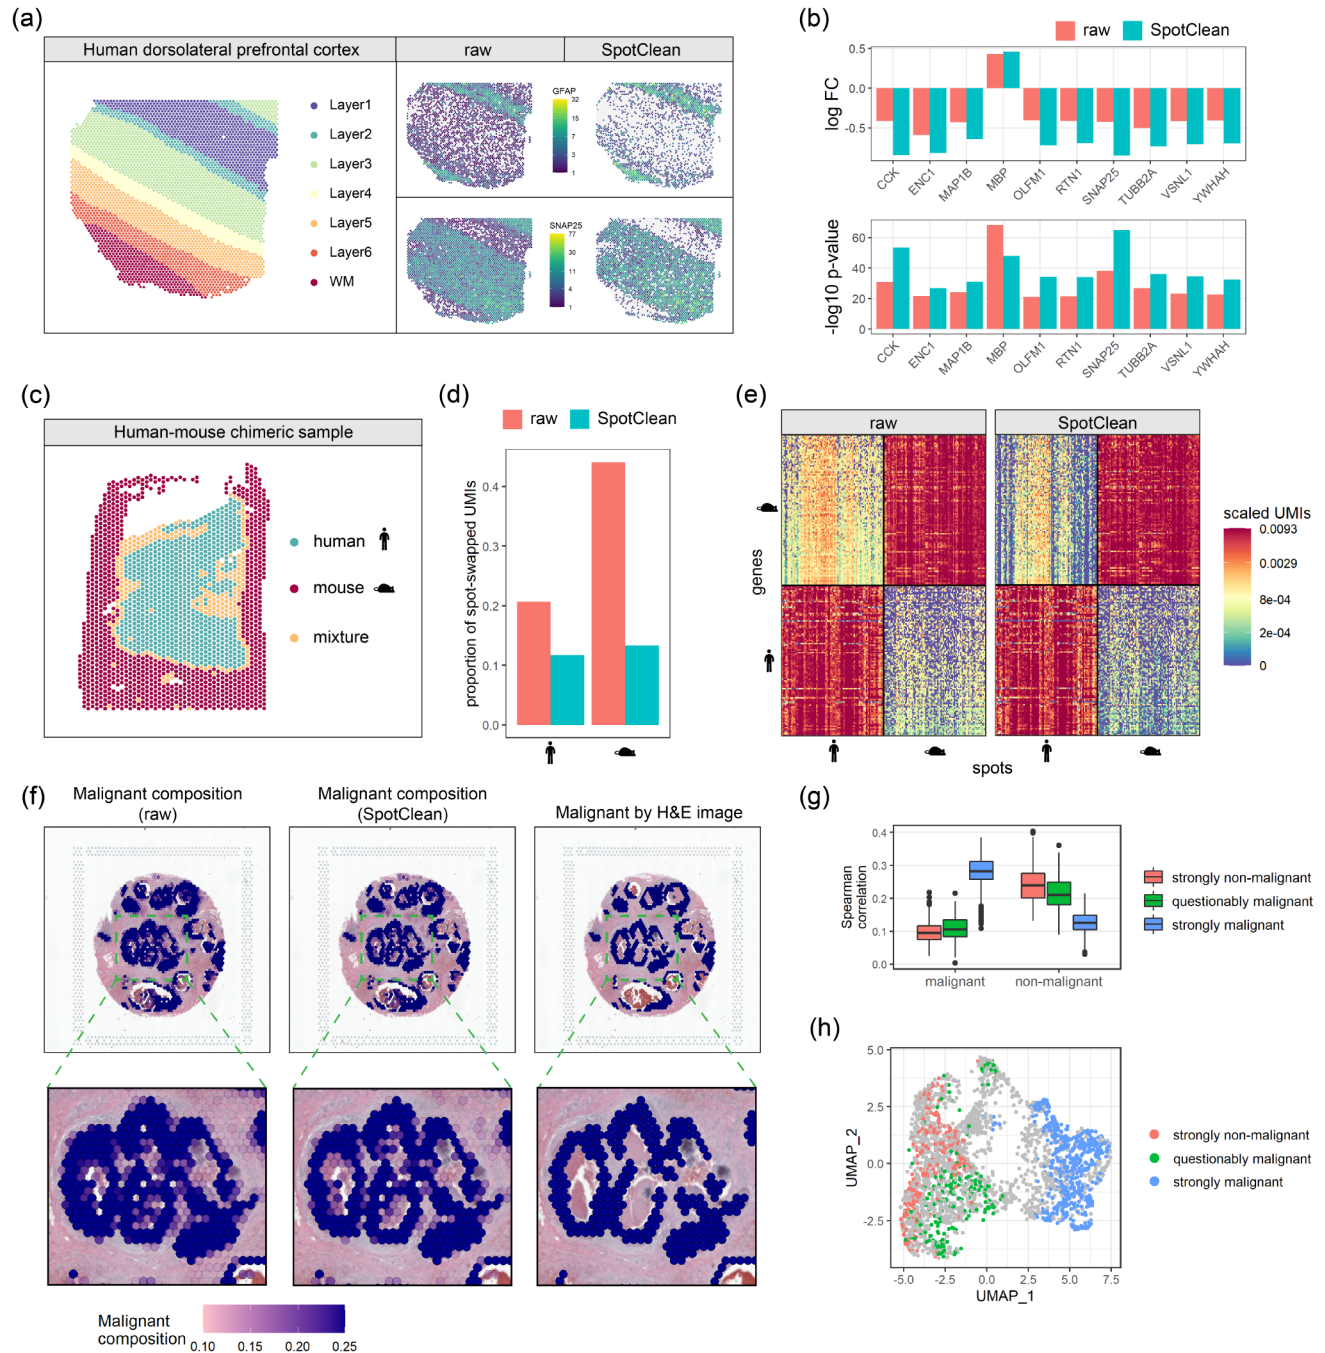

145

146

147

148

149

150

151

152

153

154

155

**Figure 2:** Data from the spatialLIBD study, sample LIBD\_151507 (panels a and b); the chimeric experiment, sample HM-1 (panels c-e); and a human breast cancer study, sample human\_breast\_2 (panels f-h). (a) Known annotation of different layers of the human dorsolateral prefrontal cortex (left); layer-specific marker gene expression in the raw (middle) and SpotClean decontaminated (right) data show that SpotClean provides improved specificity of marker gene expression for GFAP, a marker for WM and Layer1, and for SNAP25, a neuronal marker up-regulated in Layer2-Layer6. (b) An analysis of genes known to be differentially expressed (DE) between WM and Layer6 in raw and SpotClean decontaminated data shows that SpotClean results in increased fold-changes and smaller p-values for the majority of known DE genes. (c) Species annotation of sample HM-1, a chimeric tissue of human skin and mouse duodenum. Spots annotated as mixtures were removed

156 prior to calculating the summaries in panels (d) and (e) in an effort to ensure that the effects shown  
157 are not due to spots containing a mixture of the two species. (d) The proportion of spot-swapped UMI  
158 counts from all human genes (human-specific UMIs in background or mouse spots) are shown left for  
159 raw (salmon) and SpotClean decontaminated (turquoise) data; the proportion of spot-swapped UMI  
160 counts from all mouse genes (mouse-specific UMIs in background or human spots) are shown right.  
161 Note that there may be spot swapped UMIs within species (e.g. reads from human spot  $t$  bound by  
162 probes at human spot  $t'$ ), but they cannot be identified in this experiment. (e) Scaled expression  
163 (UMIs are scaled so that each row sums to 1) for the top 100 human genes and top 100 mouse genes  
164 in the top 100 human spots and top 100 mouse spots. The top 100 human or mouse genes (spots) are  
165 those genes (spots) with highest total UMI counts. Data decontaminated via SpotClean shows  
166 reduced expression of human genes in mouse tissue, with no reduction in human tissue; and vice  
167 versa. (f) Malignant spot composition as estimated via SPOTlight is shown for the raw data (upper  
168 left) and SpotClean decontaminated data (upper middle). The raw data identifies many spots as  
169 malignant whereas the SpotClean decontaminated data more closely resembles the annotations  
170 derived from the H&E image (upper right). The inserts highlighted in the upper panel are shown in  
171 the lower panel. (g) Spearman correlations between average expression in the malignant scRNA-seq  
172 cells and spot-specific expression were calculated. Boxplots of correlations are shown for 265  
173 strongly non-malignant spots, 216 questionably malignant spots (spots labelled malignant in the raw  
174 data, but not the SpotClean decontaminated data), and 546 strongly malignant spots. Correlations  
175 with non-malignant scRNA-seq cells are also shown. The correlations show that expression in the  
176 questionably malignant spots more closely resembles that in non-malignant cells suggesting that the  
177 malignant classification in the raw data at these spots is likely false due to spot swapping. (h) The  
178 UMAP plot further demonstrates that the questionably malignant spots are likely false positives as  
179 their expression more closely resembles that at non-malignant spots.  
180

181 **DATA AVAILABILITY**

182 Raw sequence data for the 3 human-mouse chimeric experiments are available at GEO (accession  
183 number: GSE178221). Links to 14 public spatial transcriptomics datasets are available in  
184 Supplementary Table 7. The human breast cancer single-cell RNA-seq data from Chung *et al.*<sup>6</sup> is  
185 available at GEO (accession number: GSE75688).

186

187 **CODE AVAILABILITY**

188 The R package *SpotClean* is available at <https://github.com/zijianni/SpotClean> and will be submitted  
189 to Bioconductor. Codes for simulation and real data analyses as well as processed data can be found at  
190 [https://github.com/zijianni/codes\\_for\\_SpotClean\\_paper](https://github.com/zijianni/codes_for_SpotClean_paper).

191

192 **ACKNOWLEDGMENTS**

193 This work was supported by NIH GM102756 and NIH UL1TR002373. The authors thank the  
194 University of Wisconsin Translational Research Initiatives in Pathology (TRIP) laboratory for  
195 assistance with sample preparation (P30 CA014520 and S10 OD023526) and the University of  
196 Wisconsin Biotechnology Center DNA Sequencing Facility for providing RNA sequencing facilities  
197 and services.

198

199 **AUTHOR CONTRIBUTIONS**

200 Z.N. discovered the spot swapping artifact. Z.N. and C.K. designed the research and wrote the first  
201 version of the manuscript. Z.N., C.K., and M.N. developed the SpotClean method. A.P. and R.H.  
202 designed the chimeric samples and conducted the chimeric experiments. Z.N. and S.C. conducted  
203 simulations and quality control evaluations. Z.N., S.C. and C.K. built and tested the R package. All  
204 authors contributed to writing the manuscript.

205

206 **COMPETING FINANCIAL INTERESTS**

207 None.

208



## 209 ONLINE METHODS

210

211 **Versions:** The following software and packages were used in the analysis: R-4.0.2; R/SpotClean-  
212 0.99.0; R/SoupX-1.5.0; R/celda-1.5.11; R/Seurat-3.2.2; R/scran-1.17.20; R/SPOTlight-0.1.7;  
213 R/reticulate-1.16; Python-3.7.4; Python/spatialde-1.1.3; FastQC-0.11.7; MultiQC-1.9; Space Ranger-  
214 1.2.2; Loupe Browser-4.2.0.

215

216 **SpotClean:** Let  $K$  be the total number of spots,  $G$  be the set of genes,  $I_t$  be the set of tissue spots  
217 with cardinality  $|I_t| = K_t$ , and  $I_b$  be the set of background spots with cardinality  $|I_b| = K_b$  where  
218  $K_t + K_b = K$ . The true (i.e., uncontaminated) UMI counts are given by  $\{Y_{g,t}\}_{g \in G, t \in I_t}$  and observed  
219 counts by  $\mathcal{D} = \{X_{g,j}\}_{g \in G, j \in I_t \cup I_b}$ . As our interest here is to characterize the extent of spot swapping,  
220 we introduce the missing variable  $B_{g,t,j}$  to be the UMI count for gene  $g$  leaving tissue spot  $t$  and  
221 binding to tissue (or background) spot  $j$ . Likewise we define  $S_{g,t}$  to be the UMI count arising from  
222 gene  $g$  in tissue spot  $t$  that remain at that spot and thus are not subject to bleeding. We decompose  
223  $Y_{g,t}$  into a sum:  $Y_{g,t} = S_{g,t} + B_{g,t}$ , where  $B_{g,t} = \sum_{k \in I_t} B_{g,t,k}$  counts all bleed-outs from spot  $t$  to other  
224 spots  $k \neq t$ . Extending notation, we set  $Y_{g,b} = S_{g,b} = B_{g,b} = 0$  for background spots  $b \in I_b$  since  
225 background spots do not express mRNA. With these missing variables defined, we note that the  
226 measured count  $X_{g,j} = S_{g,j} + R_{g,j}$  where  $R_{g,j} = \sum_{k \in I_t} B_{g,k,j}$  represents UMI counts received at spot  $j$   
227 due to spot swapping. We leverage this missing-data formulation by flexibly modeling the  
228 component counts with independent Poisson distributions, which are known to be effective for UMI  
229 counts<sup>7</sup>.

230

231 For a collection of spot and gene-specific parameters, as well as global parameters controlling the  
232 swapping rates, we parameterize the distributions as:  $S_{g,t} \sim \text{Poisson}(\mu_{g,t}(1 - r_\beta))$  and  $B_{g,t,j} \sim$   
233  $\text{Poisson}(\mu_{g,t} r_\beta \left[ (1 - r_\gamma) w_{t,j} + r_\gamma \frac{1}{K} \right])$  where  $r_\beta$  is the bleeding rate;  $r_\gamma$  is a distal and  $1 - r_\gamma$  is a  
234 proximal contamination rate. By taking the global bleeding rate  $r_\beta \in [0,1]$ , it follows that the  
235 uncontaminated counts follow:  $Y_{g,t} \sim \text{Poisson}(\mu_{g,t})$  for target parameters  $\mu_{g,t}$  whose estimates  
236 constitute statistical estimates of the uncontaminated counts. Likewise for measured counts,  $X_{g,j} \sim$   
237  $\text{Poisson}(\eta_{g,j})$ , for induced gene and spot parameters. We define  $w_{t,j}$  by a weighted Gaussian kernel:  
238  $w_{t,j} = K(d_{t,j}, \sigma) / \sum_{j'} K(d_{t,j'}, \sigma)$  where  $d_{t,j}$  is the physical Euclidean distance between spots  $t$  and  $j$

239 measured in pixels in the slide image,  $\sigma$  is the kernel bandwidth, and  $K(d, \sigma) = e^{(-d^2/2\sigma^2)}$  is a  
 240 Gaussian kernel<sup>8</sup>.

241

242 **Parameter estimation:** Plug-in estimates obtained by minimizing the residual sum of squares (RSS)  
 243 between observed total counts and their expected values are used to estimate  $r_\beta, r_\gamma$ , and  $\sigma$ .

244 Specifically,

245 
$$(\hat{r}_\beta, \hat{r}_\gamma, \hat{\sigma}, \{\hat{\mu}_{\cdot t}\}_{t \in I_t}) = \underset{r_\beta, r_\gamma, \sigma, \{\mu_{\cdot t}\}_{t \in I_t}}{\operatorname{argmin}} \sum_{j \in I_t \cup I_b} (X_{\cdot j} - \eta_{\cdot j})^2$$

246 where  $X_{\cdot j}, \eta_{\cdot j}, \mu_{\cdot j}$  are the summations of  $X_{g,j}, \eta_{g,j}, \mu_{g,j}$  among all genes, respectively. To reduce  
 247 computational complexity,  $\hat{\sigma}$  is taken as the minimum RSS calculated over a grid of candidate values.

248 Explicit gradients are calculated for  $r_\beta$  and  $r_\gamma$  and estimates are obtained by L-BFGS-B gradient

249 descent<sup>9</sup>. Details are provided in Supplementary Section S2. Since this optimization problem is not

250 necessarily convex, it is important to choose appropriate initial values. For the initial values  $\{\mu_{\cdot t}^{(0)}\}_{t \in I_t}$

251 of  $\{\mu_{\cdot t}\}_{t \in I_t}$ , we use the observed total UMI counts  $\{X_{\cdot t}\}_{t \in I_t}$  in tissue spots and scale them up so that

252 they sum to the total UMIs in the data. The initial bleeding rate,  $r_\beta^{(0)}$ , is the average expression in

253 background spots divided by the average expression in all spots; and the initial distal contamination

254 rate,  $r_\gamma^{(0)}$ , is defined by average expression in the 25<sup>th</sup>-50<sup>th</sup> percentile of all background spots divided

255 by average expression in all background spots.

256

257 With estimates  $\hat{r}_\beta, \hat{r}_\gamma, \hat{\sigma}$  of the global parameters, true expression levels  $\{\mu_{g,t}\}_{g \in G, t \in I_t}$  are readily

258 estimated using an expectation-maximization (EM) algorithm<sup>10</sup>. Details are provided in

259 Supplementary Section S3. For the initial values of true expressions  $\{\mu_{g,t}^{(0)}\}_{g \in G, t \in I_t}$ , we use the

260 observed UMI counts  $\{X_{g,t}\}_{g \in G, t \in I_t}$  and scale up each gene so that their summations are equal to the

261 gene summations in all spots.

262

263 **Estimation of spot-level contamination rate:** For tissue spot  $t$ , let  $c_t$  be the proportion of

264 contaminated UMIs from total observed UMIs. We estimate  $c_t$  using the estimated contamination

265 received in  $t$  over its estimated contaminated total counts from model fitting:  $\hat{c}_t =$

266 
$$\frac{\hat{E}(\sum_{t' \in I_t - \{t\}} \sum_g B_{g,t',t})}{\hat{E}(X_{\cdot t})}$$
. Validation of this estimate is provided in Supplementary Figure 12.

267 **Analysis of publicly available case study datasets:** We downloaded UMI count matrices for 14  
268 publicly available datasets, of which 12 came from 10x Visium and 2 came from Slide-seqV2<sup>2</sup>; links  
269 are provided in Supplementary Table 7. For each Visium dataset considered, the count matrix was  
270 normalized via scran<sup>11</sup>, following the Seurat<sup>12</sup> pipeline for dimension reduction, clustering, and  
271 visualization. Seurat functions *FindVariableFeatures*(*nfeatures* = 4000), *ScaleData*(), *RunPCA*(),  
272 *RunUMAP*(), *FindNeighbors*(), and *FindClusters*() were applied under default settings. For each  
273 Slide-seqV2 dataset, we inspected total UMI counts of all spatial barcodes in the raw count matrix.

274  
275 **Application of SoupX, DecontX, and SpotClean:** Default parameters were used for SpotClean and  
276 DecontX. Since SoupX requires manual input of clusters, we first applied the Seurat pipeline on the  
277 raw tissue UMI count matrix to get cluster labels, with functions *NormalizeData*(),  
278 *FindVariableFeatures*(), *ScaleData*(), *RunPCA*(), *FindNeighbors*(), *FindClusters*() applied under  
279 default settings. Parameters for SoupX (*soupRange* in *estimateSoup*(), *tfidfMin* and *soupQuantile* in  
280 *autoEstCont*()) were manually tuned when the default settings failed. Some datasets did not run even  
281 after parameter tuning; results from these datasets are marked as NA. SpotClean decontaminates  
282 genes with average expression above 1, high variance as determined by Seurat's  
283 *FindVariableFeatures*() function, or both. All methods were applied to these same set of genes. In the  
284 simulated data, we force all methods to decontaminate all genes since there are relatively few (1000  
285 or 3000 genes depending on the simulation).

286  
287 **Identification of marker genes and DE genes:** The spatialLIBD project presented in Maynard *et*  
288 *al.*<sup>3</sup> consists of spatial expression in the six-layered dorsolateral prefrontal cortex (DLPFC). The  
289 authors identified a number of marker genes for distinct layers of the DLPFC. In addition to these, we  
290 also considered marker genes from a single-cell RNA-seq study of Alzheimer's disease<sup>13</sup> where  
291 markers differentiating between known cell types were identified. The markers shown here were  
292 selected from these papers if they were highly expressed (in the upper 25<sup>th</sup> percentile) in the  
293 spatialLIBD datasets. We also evaluate the genes reported as DE between WM and Layer6 in  
294 Maynard *et al.*<sup>3</sup>. We filtered their list of DE genes and considered those genes having  $FDR \leq 10^{-4}$ .  
295 From those, we chose the top 100 highest expressors in the raw data, sorted by fold change, and  
296 selected the top 10 for each dataset. For the DE analysis, raw and decontaminated tissue matrices  
297 were normalized using scran<sup>11</sup>; for each gene, p-values were obtained from a two-sample two-sided t-

298 test between the 354 spots in WM and the 486 spots in Layer6. Summary statistics for the tests in  
299 Figure 2b are reported in Supplementary Tables 8-9.

300

301 **Human-mouse chimeric experiment:** Fresh sections of normal human skin tissue were obtained  
302 with consent during routine dermatologic surgery under University of Wisconsin School of Medicine  
303 and Public Health Institutional Review Board (Approval #2010-0367). On the same day, fresh mouse  
304 tissue was harvested. All mouse husbandry and experimental procedures were performed in  
305 accordance and compliance with policies approved by the University of Wisconsin Research Animals  
306 Research and Compliance committee (Protocol #M5131). Three mixed species tissue blocks were  
307 then prepared under cold conditions as follows and frozen over a bed of dry ice and stored at - 80°C  
308 in optimal tissue cutting (OCT) medium until they were ready to use:

309

310 HM-1: Duodenum from a 10-week-old C57BL/6J mouse as casing to a 4 mm punch section  
311 “cylinder” of human skin

312 HM-2: Colon from a 10-week-old C57BL/6J mouse as casing to a 4 mm punch section “cylinder” of  
313 human skin

314 HM-3: Heart from a 10-week-old C57BL/6J mouse encasing a 4 mm punch section “cylinder” of  
315 human skin

316

317 **Visium Spatial Transcriptomics:** The Visium Spatial Tissue Optimization Slide & Reagent kit  
318 (10X Genomics) was used to optimize permeabilization conditions for the chimeric tissue according  
319 to manufacturer’s protocol and yielded an optimal tissue permeabilization time of 12 minutes. The  
320 Visium Spatial Gene Expression Slide & Reagent kit (10X Genomics) was used to generate  
321 sequencing libraries. Sections were cut at 10 µm thickness and mounted onto Visium slide capture  
322 areas, stained with H&E, digitally imaged, and then permeabilized for library preparation.  
323 Sequencing libraries were prepared following the manufacturer’s protocol. Initial quality control of  
324 the libraries was by analysis of 2x150 MiSeq data for each sample. The libraries were then sequenced  
325 on a NovaSeq 6000 (Illumina), with 29 bases from read 1 and 101 from read 2, at a depth of 500k-  
326 600k reads per spot. The actual depth was 455652, 440024, 538709 reads per spot for sample HM-1,  
327 HM-2, HM-3, respectively.

328

329 **Alignment and pre-processing in the chimeric experiment:** The sequencing quality of each  
330 sample was evaluated using FastQC<sup>14</sup> and MultiQC<sup>15</sup>. All FastQ files passed quality control. Tissues  
331 were manually aligned using the Loupe Browser. Reads were aligned to the GRCh38+mm10  
332 reference genome (refdata-gex-GRCh38-and-mm10-2020-A from  
333 <https://support.10xgenomics.com/single-cell-gene-expression/software/downloads/latest>) and gene  
334 expression was quantified using Space Ranger under default parameters. Following alignment, we  
335 considered only those reads confidently mapped by SpaceRanger; confidently mapped reads  
336 are reads that map uniquely to a gene. We refer to a gene as a human gene if it has prefix GRCh38; a  
337 mouse gene has prefix mm10. UMI counts were normalized for differences in total counts across  
338 species by scaling total UMI counts in mouse to match total UMI counts in human.  
339 Genes having average expression  $<0.01$  were removed.

340  
341 **Human and mouse tissue spot annotation in the chimeric experiment:** Tissue spots were labelled  
342 as human, mouse, or histopathological mixture based on visual inspection of the H&E images. A  
343 histopathological mixture spot is one with tissue contributions from both species that can be visually  
344 verified in the H&E stained image. A pure human or pure mouse spot was relabeled as a  
345 computational mixture spot if the spot label differed from the majority of UMIs. Specifically, a  
346 human (or mouse) spot was labelled as a computational mixture if the total UMI counts from mouse  
347 (human) exceeded the median of total UMI counts across all mouse spots (human spots). Both  
348 histopathological or computational mixture spots were removed prior to analyses in an effort to  
349 ensure that the effects shown are not due to spots containing a mixture of the two species.

350  
351 **Lower bound on the proportion of spot swapped reads (LPSS):** Spot swapped reads include reads  
352 from one tissue spot binding background probes (tissue-to-background) as well as reads at one tissue  
353 spot binding probes at another tissue spot (tissue-to-tissue). It is not possible to directly measure  
354 tissue-to-tissue swapping in most cases. However, the chimeric experiment provides some insight  
355 into the extent of spot swapping tissue-to-tissue. We define LPSS in the chimeric experiment as the  
356 proportion of misclassified reads (mouse reads in human spots, human reads in mouse spots, and  
357 reads in background spots). This is a lower bound as it does not account for spot swapping within  
358 species (e.g. reads from human spot  $t$  bound by probes at human spot  $t'$ ).

359



360 **Cell type decomposition of the human breast cancer data:** For cell type decomposition, we  
361 applied SPOTlight<sup>16</sup> to the Visium human breast cancer data (referred to here as human\_breast\_2;  
362 details on this data are provided in Supplementary Table 7). SPOTlight<sup>16</sup> requires single-cell RNA-  
363 seq data to use as a reference; for this, we used the human breast cancer single-cell RNA-seq data  
364 from Chung *et al.*<sup>6</sup> SPOTlight<sup>16</sup> was applied to the raw data under default settings to estimate the cell  
365 type composition of every spot; SPOTlight<sup>16</sup> was also applied to the SpotClean decontaminated data  
366 under default settings. Note that since tumor cell populations are heterogeneous, and spots contain  
367 multiple cells, most spots containing malignant cells will also contain non-malignant cells. Following  
368 clinical practice, we label a spot as malignant if there is any evidence of malignancy. Specifically, we  
369 annotate spots as malignant if the estimated malignant cell composition exceeds 10%, which  
370 corresponds to approximately 1 malignant cell in the spot since the estimated number of cells in a  
371 spot is approximately 10 in Visium data<sup>16</sup>. We further define non-malignant spots as "strongly non-  
372 malignant" if the non-malignant cell composition exceeds 95%, and "strongly malignant" if the  
373 malignant cell composition exceeds 30% in both raw and decontaminated data. "Questionably  
374 malignant" is used to refer to spots called malignant in the raw data, but not the SpotClean  
375 decontaminated data. Spearman correlations between the expression of each spot and the average  
376 expression of malignant cells in the reference single-cell data were calculated to measure the  
377 similarity of each spot group (strongly non-malignant, strongly malignant, or questionably malignant)  
378 to malignant cells; the same was done to measure similarity of each spot group to non-malignant  
379 cells. Boxplots in Figure 2g demonstrate the median, upper and lower quartile, range without outliers,  
380 and outlier values of the Spearman correlations for each group of spots using default plotting  
381 functions. The Seurat pipeline, as described previously, was applied under default settings to the  
382 decontaminated data to produce the UMAP plot. In the H&E image, tissue spots were labelled as  
383 malignant and non-malignant based on visual inspection.

384

385 **Simulations:** SimI simulates the spot swapping effect to get contaminated UMI counts given an  
386 input dataset. Specifically, starting from an input UMI count matrix of real data, 3000 genes with  
387 highest total UMI counts were selected. Expression for these genes was scaled to target the same  
388 average UMI total counts (average taken over spots) across input datasets. Denote the resulting  
389 matrix by  $\{\mu_{g,t}\}_{t \in I_t}$ . The bleeding rate  $r_\beta$  and distal contamination rate  $r_\gamma$  were estimated from the  
390 input data, using the same approach as described for obtaining initial values in SpotClean. The spot

391 distances  $\{d_{t,j}\}_{t \in I_t, j \in I_t \cup I_b}$  were calculated based on the spot coordinates in the H&E image of the  
392 input dataset; the contamination radius,  $\sigma$ , was set to 10; and the weights which describe the  
393 proportion of UMIs swapping locally from tissue spot  $t$  to any spot  $j$ ,  $w_{t,j}$ , is given by a Gaussian  
394 kernel. The expected contamination of gene  $g$  from tissue spot  $t$  to spot  $j$  is then given by  
395  $\mu_{g,t} r_\beta \left[ (1 - r_\gamma) w_{t,j} + r_\gamma \frac{1}{K} \right]$ . Summing contamination from all tissue spots to spot  $j$  and adding the  
396 UMIs that stay at  $j$ ,  $\mu_{g,j} (1 - r_\beta)$ , gives the expected observed expression  $\eta_{g,j}$ . Simulated counts for  
397 gene  $g$  in spot  $j$  are sampled from  $\text{Poisson}(\eta_{g,j})$ .

398  
399 Additional simulations are similar, but proximal contamination weights are not given by a Gaussian  
400 kernel. Rather, SimII, SimIII, and SimIV assume proximal contamination weights are given by a  
401 Linear, Laplace, and Cauchy kernel, respectively.

402  
403 For SimV, starting from a UMI count matrix of real data, we select the top 5000 most highly  
404 expressed genes; any gene having average expression less than 0.1 is removed. SpatialDE<sup>17</sup> is then  
405 applied using default settings; the top 500 highest expressed genes with q-value  $\leq 0.01$  are identified  
406 as true spatially variable (SV) genes. For each SV gene, we simulate a matched non-SV gene by  
407 sampling independent Poisson counts parameterized by the average expression of the SV gene.

## 408 409 **References**

- 411 1. Ståhl, P. L. *et al.* Visualization and analysis of gene expression in tissue sections by spatial  
412 transcriptomics. *Science* vol. 353 78–82 (2016).
- 413 2. Stickels, R. R. *et al.* Highly sensitive spatial transcriptomics at near-cellular resolution with  
414 Slide-seqV2. *Nature Biotechnology* **39**, 313–319 (2021).
- 415 3. Maynard, K. R. *et al.* Transcriptome-scale spatial gene expression in the human dorsolateral  
416 prefrontal cortex. *Nature Neuroscience* **24**, 425–436 (2021).
- 417 4. Young, M. D. & Behjati, S. SoupX removes ambient RNA contamination from droplet-based  
418 single-cell RNA sequencing data. *GigaScience* **9**, 1–10 (2020).
- 419 5. Yang, S. *et al.* Decontamination of ambient RNA in single-cell RNA-seq with DecontX.  
420 *Genome Biology* **21**, 57 (2020).
- 421 6. Chung, W. *et al.* Single-cell RNA-seq enables comprehensive tumour and immune cell  
422 profiling in primary breast cancer. *Nature Communications* 2017 8:1 **8**, 1–12 (2017).
- 423 7. Kim, T. H., Zhou, X. & Chen, M. Demystifying “drop-outs” in single-cell UMI data. *Genome*  
424 *Biology* **21**, 196 (2020).
- 425 8. Chung, M. K. Gaussian kernel smoothing. (2021).
- 426 9. Byrd, R. H., Lu, P., Nocedal, J. & Zhu, C. A Limited Memory Algorithm for Bound  
427 Constrained Optimization. *SIAM Journal on Scientific Computing* **16**, 1190–1208 (1995).

- 428 10. Dempster, A. P., Laird, N. M. & Rubin, D. B. Maximum Likelihood from Incomplete Data via  
429 the EM Algorithm. *Journal of the Royal Statistical Society. Series B (Methodological)* **39**, 1–  
430 38 (1977).
- 431 11. Lun, A. T., Bach, K. & Marioni, J. C. Pooling across cells to normalize single-cell RNA  
432 sequencing data with many zero counts. *Genome Biology* **17**, 75 (2016).
- 433 12. Stuart, T. *et al.* Comprehensive Integration of Single-Cell Data. *Cell* **177**, 1888-1902.e21  
434 (2019).
- 435 13. Mathys, H. *et al.* Single-cell transcriptomic analysis of Alzheimer’s disease. *Nature* **570**, 332–  
436 337 (2019).
- 437 14. Andrews, S., Krueger, F., Secondi-Pichon, A., Biggins, F. & Wingett, S. FastQC: A quality  
438 control tool for high throughput sequence data. Babraham Bioinformatics. *Babraham Institute*  
439 vol. 1 1  
440 <https://www.bioinformatics.babraham.ac.uk/projects/fastqc/>  
441 <http://www.bioinformatics.babraham.ac.uk/projects/fastqc/> (2015).
- 442 15. Ewels, P., Magnusson, M., Lundin, S. & Källér, M. MultiQC: summarize analysis results for  
443 multiple tools and samples in a single report. *Bioinformatics* **32**, 3047–3048 (2016).
- 444 16. Elosua-Bayes, M., Nieto, P., Mereu, E., Gut, I. & Heyn, H. SPOTlight: seeded NMF  
445 regression to deconvolute spatial transcriptomics spots with single-cell transcriptomes. *Nucleic*  
446 *Acids Research* **49**, e50–e50 (2021).
- 447 17. Svensson, V., Teichmann, S. A. & Stegle, O. SpatialDE: Identification of spatially variable  
448 genes. *Nature Methods* **15**, 343–346 (2018).  
449
